# Supplementary material for: Triethanolamine stabilized non-alkyl Sn4Cd4 and alkyl Sn2Cd12 oxo clusters with distinct electrocatalytic activities
Source: Royal Society of Chemistry journal article supplement (doi:10.1039/d2cc00574c), 2022-01-01
Supplement: d2cc00574c1.pdf [file d2cc00574c1.pdf]

*Electronic Supplementary Information*

**Triethanolamine stabilized non-alkyl Sn<sub>4</sub>Cd<sub>4</sub> and alkyl Sn<sub>2</sub>Cd<sub>12</sub> oxo clusters with distinct electrocatalytic activities**

*Di Wang<sup>a, b</sup>, Guang-Hui Chen<sup>a</sup>, San-Tai Wang<sup>a, b</sup>, Jian Zhang<sup>a</sup> and Lei Zhang<sup>\*a</sup>*

<sup>a</sup> State Key Laboratory of Structural Chemistry, Fujian Institute of Research on the Structure of Matter,  
Chinese Academy of Sciences, Fuzhou, Fujian, 35002, P. R. China

<sup>b</sup> University of Chinese Academy of Science, 100049, Beijing, P. R. China

*\* Corresponding Author*

*E-mail: [LZhang@fjirsm.ac.cn](mailto:LZhang@fjirsm.ac.cn)*

## Methods

**Materials and Instruments.** All the chemical reagents were commercially purchased and used without further purification. SnF<sub>2</sub> and butyltin oxide were purchased from Energy Chemical, Cadmium hydroxide was purchased from Aladdin. KCl was purchased from Alfa, while triethanolamine, ethanol, N, N-Dimethylformamide (DMF), acetonitrile and ethylenediamine were bought from Sino pharm Chemical Reagent Beijing. IR spectrum was obtained on a Vertex 7.0 spectrometer with pressed KBr pellets in the range of 4000-400 cm<sup>-1</sup>. Thermogravimetric analysis was performed on a Mettler Toledo TGA/SDTA 851<sup>e</sup> thermal analyzer in flowing N<sub>2</sub> atmosphere with a heating rate of 10 °C/min. Powder XRD patterns was obtained by using a Miniflex II diffractometer with CuK<sub>α</sub> radiation ( $\lambda = 1.54056 \text{ \AA}$ ). Elemental analyses (C, H and N) were performed on a vario MICRO elemental analyzer. ICP analysis was conducted by using Inductively Coupled Plasma MS spectrometer (Agilent 7700). (details of sample preparation: a certain amount of bulk samples (**TOC-40**~0.06 g, **TOC-41**~0.06 g) were placed in a digestion tank, then excess aqua regia was added and heated to 200 °C until completely digested). X-ray photoelectron spectroscopy (XPS) analysis was carried out on ESCALAB Xi<sup>+</sup> XPS system (Thermo Fisher Scientific) with Al K<sub>α</sub> X-ray radiation (1486.6 eV). The <sup>1</sup>H NMR experiments were carried on a JNM-ECZ400S spectrometer at frequency of 400 MHz. Gas chromatography (GC) was performed with an GC-2014C (SHIMADZU) gas chromatography system equipped with flame ionization detectors and a thermal conductivity detector (TCD). The liquid products were detected by CIC-D100 automatic range ion chromatograph.

**Synthesis of TOC-40.** SnF<sub>2</sub> (0.157 g, 1.0 mmol), Cd(OH)<sub>2</sub> (0.146 g, 1.0 mmol), triethanolamine (1ml), acetonitrile (4ml) and 1 drop ethylenediamine, 2 drop H<sub>2</sub>O were mixed and then sealed in a vial and transferred to a preheated oven heated to 80 °C for 4 days. After cooling to room temperature, colorless crystals of **TOC-40** were obtained with a yield of ~32% based on Sn. Elemental analysis (%) for C<sub>36</sub>H<sub>80</sub>Cd<sub>4</sub>F<sub>4</sub>N<sub>6</sub>O<sub>22</sub>Sn<sub>4</sub>, calc: Sn, 24.36; Cd, 23.06; C, 22.18; H, 4.14; N, 4.31. Found: Sn, 23.87; Cd, 22.44; C, 22.27; H, 4.36; N, 4.33.

**Synthesis of TOC-41.** Butyltin oxide (0.05g, 0.24mmol), Cd(OH)<sub>2</sub> (0.2 g, 1.36 mmol), KCl (0.01g, 0.13mmol), triethanolamine (1ml), N, N-Dimethylformamide (4ml) and 1 ml ethanol were mixed and then sealed in a vial and transferred to a preheated oven heated to 80 °C for 3 days. After cooling to

room temperature, yellow crystals of **TOC-41** were obtained with a yield of ~65% based on Cd. Elemental analysis (%) for  $C_{57}H_{114}Cd_{12}Cl_4N_8O_{29}Sn_2$ , calc: Sn, 7.65; Cd, 43.46; C, 22.06; H, 3.70; N, 3.61. Found: Sn, 9.18; Cd, 43.52; C, 22.94; H, 3.73; N, 4.15.

**Single-crystal X-ray diffraction.** **TOC-40** were collected on Hybrid Pixel Array detector equipped with Ga-K $\alpha$  radiation ( $\lambda = 1.3405 \text{ \AA}$ ) at about 99.99 K. **TOC-41** was collected on Supernova single crystal diffractometer equipped with graphite-monochromatic Cu K $\alpha$  radiation ( $\lambda = 1.54178 \text{ \AA}$ ) at 100 K. The program SADABS was used for absorption correction. Structure was solved by direct method and refined by full-matrix least-squares on  $F^2$  using SHELXTL.<sup>[1]</sup> Non-hydrogen atoms were refined anisotropically. CCDC 2144824-2144825 contain the supplementary crystallographic data for this paper. These data are provided free of charge by The Cambridge Crystallographic Data Centre.

**Electrochemical Measurements.** Electrochemical experiments were performed on a CHI 760e electrochemical workstation (Chenhua, Shanghai, China) using a gas-tight two-compartment electrochemical cell with a Nafion-117 proton exchange membrane as the separator. Each compartment contained 20 mL of 0.5 M  $KHCO_3$  electrolyte, and the electrolyte was pre-saturated with high-purity Ar or  $CO_2$  (Ar: pH = 8.74;  $CO_2$ : pH = 7.50). The platinum net ( $1.0 \times 1.0 \text{ cm}^2$ ) electrode and the Ag/AgCl electrode (the saturated KCl filling solution) were used as counter and reference electrode, respectively. The reference electrode potentials were converted to the value versus RHE by the equation:  $E \text{ (vs. RHE)} = E \text{ (vs. Ag/AgCl)} + 0.197 \text{ V} + 0.0591 \text{ V} \times \text{pH}$ . The working electrode was prepared by pipetting the 50  $\mu\text{L}$  of sample ink onto a carbon paper electrode ( $1 \times 1 \text{ cm}^2$ ) with a loading of  $0.53 \text{ mg/cm}^2$ . Typically, 5.3 mg of sample was dispersed into  $H_2O$ /ethanol (370/80  $\mu\text{L}$ ) solution followed by adding 50  $\mu\text{L}$  Nafion, then the mixture was ultrasonicated for 30 min to achieve a homogeneous ink.

For  $CO_2$  electroreduction reaction, a flow of 20 sccm of  $CO_2$  was continuously bubbled into the electrolyte to maintain its saturation. The linear sweep voltammetry (LSV) was performed at a scan rate of 5 mV/s. The electrolysis was conducted at selected potentials for 2 h to determine the reduction products and their Faradaic efficiencies.

**Additional details for product analysis of CO<sub>2</sub> electroreduction.** Analysis of liquid products by NMR: 10.0 mL of D<sub>2</sub>O was mixed with 3.53 μL of dimethyl sulfoxide (DMSO) as solution A for next step. Then, 500 μL of the electrolyte after electrolysis was mixed with 100 μL of D<sub>2</sub>O and 50 μL of solution A (DMSO as internal standard) for <sup>1</sup>H NMR analysis. The water suppression method was used.

The gaseous products (H<sub>2</sub> and CO) were periodically sampled and examined by gas chromatography (GC-2014C, SHIMADZU) with N<sub>2</sub> as the carrier gas. They were first analyzed by a thermal conductivity detector (TCD) for the H<sub>2</sub> concentration, and then analyzed by flame ionization detector (FID) with a methanizer for CO. The concentration of gaseous products was quantified by the integral area ratio of the reduction products to standards.

The faradic efficiency of formate was calculated as follow <sup>[3]</sup>:

$$FE(\%) = \frac{Q_{formate}}{Q_{total}} = \frac{n_{formate} \times N \times F \times 100 \%}{j \times t} \quad (1)$$

Where  $n_{formate}$  is the measured amount of formate in the cathodic compartment;  $N$  is the number of electrons required to form a molecule of formate ( $N = 2$ );  $F$  is the Faraday constant;  $j$  is the recorded current;  $t$  is the reaction time.

The faradic efficiencies of gaseous products were calculated as follow <sup>[3]</sup>:

The volume of the sample loop ( $V_0$ ) in GC is 1 cm<sup>3</sup> and the flow rate of the gas is  $v = 20$  cm<sup>3</sup>/min.

The time it takes to fill the sample loop is:

$$t_0 = \frac{V_0}{v} = \frac{1 \text{ cm}^3}{20 \text{ cm}^3/\text{min}} = 0.05 \text{ min} = 3 \text{ s} \quad (2)$$

According to the ideal gas law, under ambient temperature of 25 °C, the amount of gas in each vial ( $V_0 = 1$  cm<sup>3</sup>) is:

$$n = \frac{P \times V_0}{R \times T_0} = \frac{1.013 \times 10^5 \text{ Pa} \times 1 \times 10^{-6} \text{ m}^3}{8.314 \text{ J} \cdot \text{K}^{-1} \cdot \text{mol}^{-1} \times 298.15 \text{ K}} = 4.0866 \times 10^{-5} \text{ mol} \quad (3)$$

The number of electrons required to form a molecule of CO or H<sub>2</sub> are 2. Therefore, the number of electrons ( $n_i$ ) needed to get  $x_i$  ppm of CO or H<sub>2</sub> is:

$$n_i = x_i \times n \times N_A \times 2 \quad (4)$$

Total number of electrons ( $n_{total}$ ) measured during this sampling period:

$$n_{total} = \frac{j \times t_0}{e} \quad (5)$$

The Faraday constant  $F$  is:

$$F = N_A \times e = 6.022 \times 10^{23} \text{ mol}^{-1} \times 1.6022 \times 10^{-19} \text{ C} = 96484.484 \text{ C} \cdot \text{mol}^{-1} \quad (6)$$

Hence, the faradic efficiency of CO or H<sub>2</sub> is

$$\text{FE}(\%) = \frac{n_i}{n_{total}} \times 100 \% = \frac{x_i \times n \times F \times 2}{I_0 \times t_0} \times 100 \% \quad (7)$$

Where  $i$  represents CO or H<sub>2</sub>;  $I_0$  is the recorded current obtained from the chronoamperogram;  $N_A$  is the Avogadro constant;  $e$  is elementary charge.

## References

- [1] Sheldrick GM. *SHELXL-2014/7*: A Program for Structure Refinement; University of Göttingen: Göttingen, Germany, (2014).
- [2] A. L. Spek, *Acta Cryst.*, 2015, **C71**, 9.
- [3] D. Ren, Y. L. Deng, A. D. Handoko, C. S. Chen and S. Malkhandi, *ACS Catal.*, 2015, **5**, 2814.

**Table S1.** Crystal data summary for **TOC-40** and **TOC-41**.

| Compound                           | TOC-40                                                                                                        | TOC-41                                                                                                           |
|------------------------------------|---------------------------------------------------------------------------------------------------------------|------------------------------------------------------------------------------------------------------------------|
| Cryst. Formula                     | C <sub>36</sub> H <sub>80</sub> Cd <sub>4</sub> F <sub>4</sub> N <sub>6</sub> O <sub>22</sub> Sn <sub>4</sub> | C <sub>57</sub> H <sub>114</sub> Cd <sub>12</sub> Cl <sub>4</sub> N <sub>8</sub> O <sub>29</sub> Sn <sub>2</sub> |
| Fw                                 | 1949.42                                                                                                       | 3013.54                                                                                                          |
| Crystal system                     | Monoclinic                                                                                                    | Tetragonal                                                                                                       |
| space group                        | <i>P2<sub>1</sub>/n</i>                                                                                       | <i>I4<sub>1</sub>/acd</i>                                                                                        |
| a/ Å                               | 11.8087(9)                                                                                                    | 25.1808(6)                                                                                                       |
| b/ Å                               | 17.2847(12)                                                                                                   | 25.1808(6)                                                                                                       |
| c/ Å                               | 14.4581(9)                                                                                                    | 27.0021(8)                                                                                                       |
| α/deg.                             | 90                                                                                                            | 90                                                                                                               |
| β/deg                              | 105.059(7)                                                                                                    | 90                                                                                                               |
| γ/deg                              | 90                                                                                                            | 90                                                                                                               |
| V/ Å <sup>3</sup>                  | 2849.7(4)                                                                                                     | 17121.3(10)                                                                                                      |
| Z                                  | 2                                                                                                             | 8                                                                                                                |
| D <sub>c</sub> /g·cm <sup>-3</sup> | 2.272                                                                                                         | 2.408                                                                                                            |
| F(000)                             | 1884.0                                                                                                        | 11904.0                                                                                                          |
| T/K                                | 100.15                                                                                                        | 100.00(11)                                                                                                       |
| μ /mm <sup>-1</sup>                | 17.554                                                                                                        | 29.697                                                                                                           |
| θ range /°                         | 7.076 to 113. 816                                                                                             | 7.02 to 150.53                                                                                                   |
| Reflections collected              | 19019                                                                                                         | 17015                                                                                                            |

|                                     |                |                |
|-------------------------------------|----------------|----------------|
| Independent reflections             | 5804           | 4368           |
| GOF ( $F^2$ )                       | 1.019          | 1.076          |
| $R_1/wR_2$ [ $I > 2\sigma(I)$ ]     | 0.0641/ 0.1742 | 0.0858/ 0.2210 |
| $R_1/wR_2$ <sup>[a]</sup> (alldata) | 0.0858/ 0.1887 | 0.0899/ 0.2244 |

$$^a R_1 = \Sigma ||F_o| - |F_c|| / \Sigma |F_o|, wR_2 = [\Sigma w(F_o^2 - F_c^2)^2 / \Sigma w(F_o^2)]^{1/2}$$

**Table S2.** Selected bond lengths (Å) for **TOC-40**.

| Bond                | Length(Å) | Bond                | Length(Å) |
|---------------------|-----------|---------------------|-----------|
| Sn2-O9              | 2.188(7)  | Cd1-O9              | 2.399(6)  |
| Sn2-O8              | 2.097(6)  | Cd1-O4 <sup>1</sup> | 2.294(6)  |
| Sn2-O10             | 2.063(7)  | Cd1-O8              | 2.264(7)  |
| Sn2-N3              | 2.543(8)  | Cd1-O6              | 2.258(7)  |
| Sn1-F1              | 1.984(6)  | Cd1-N2              | 2.437(7)  |
| Sn1-O7 <sup>1</sup> | 2.085(7)  | Cd2-O9              | 2.330(7)  |
| Sn1-O4              | 2.061(7)  | Cd2-O4 <sup>1</sup> | 2.469(6)  |
| Sn1-F2              | 1.944(7)  | Cd2-O1 <sup>1</sup> | 2.347(7)  |
| Sn1-O3              | 2.037(7)  | Cd2-O10             | 2.275(8)  |
| Sn1-O6              | 2.009(6)  | Cd2-O3 <sup>1</sup> | 2.339(8)  |
| Cd1-O7 <sup>1</sup> | 2.543(6)  | Cd2-N1 <sup>1</sup> | 2.418(9)  |
| Cd1-O7              | 2.430(7)  | Cd2-O2 <sup>1</sup> | 2.398(7)  |

11-X,1-Y,1-Z

**Table S3.** Selected bond lengths (Å) for **TOC-41**.

| Bond                | Length(Å) | Bond                  | Length(Å) |
|---------------------|-----------|-----------------------|-----------|
| Sn1-O5              | 2.081(11) | Cd1-O2                | 2.388(10) |
| Sn1-O1 <sup>2</sup> | 2.091(14) | Cd1-O7                | 2.489(12) |
| Sn1-O1              | 2.091(14) | Cd1-N8                | 2.388(13) |
| Sn1-O4              | 2.102(16) | Cd1A-O5               | 2.341(9)  |
| Sn1-O4 <sup>2</sup> | 2.102(16) | Cd1A <sup>2</sup> -O5 | 2.341(9)  |
| Sn1-C1              | 2.18(3)   | Cd2A <sup>2</sup> -O5 | 2.263(10) |
| Cd3-O7              | 2.208(9)  | Cd2A-O5               | 2.263(10) |
| Cd3-O3 <sup>1</sup> | 2.234(10) | Cd1A <sup>2</sup> -O7 | 2.491(13) |
| Cd3-O6 <sup>1</sup> | 2.319(11) | Cd2A-O7               | 2.069(13) |
| Cd3-O2 <sup>2</sup> | 2.312(10) | Cd1A-O3               | 2.059(13) |
| Cd3-Cl1             | 2.442(4)  | Cd2A-O3               | 2.514(13) |
| Cd2-O5              | 2.365(5)  | Cd2A-O6               | 2.504(16) |
| Cd2-O7              | 2.323(9)  | Cd1A-O1               | 2.392(15) |
| Cd2-O3              | 2.241(9)  | Cd2A-N43              | 2.358(14) |
| Cd2-O6              | 2.353(12) | Cd2A-N4               | 2.359(14) |
| Cd2-N4              | 2.369(11) | Cd2A-O8               | 2.613(14) |
| Cd2-O8              | 2.607(10) | Cd2A <sup>1</sup> -O8 | 2.613(14) |
| Cd1-O5              | 2.327(4)  | Cd1A-N8               | 2.324(14) |
| Cd1-O3              | 2.299(9)  | Cd2A-O4               | 2.325(15) |



Cd1-O1

2.325(12)

Cd1A-O2

2.418(13)

 $^1 1-X, 3/2-Y, +Z; ^2 5/4-Y, 5/4-X, 5/4-Z; ^3 -1/4+Y, 1/4+X, 5/4-Z$ 
**Table S4** BVS calculation of Sn atom in **TOC-40**

|     |       |            |       |     |                 |            |       |
|-----|-------|------------|-------|-----|-----------------|------------|-------|
| Sn2 | 2.085 |            |       | Sn1 | 4.17            |            |       |
| Sn2 | O9    | d=2.188(7) | 0.511 | Sn1 | F1              | d=1.984(6) | 0.683 |
| Sn2 | O8    | d=2.094(7) | 0.661 | Sn1 | O7 <sup>1</sup> | d=2.085(7) | 0.615 |
| Sn2 | O10   | d=2.063(7) | 0.717 | Sn1 | O4              | d=2.061(7) | 0.656 |
| Sn2 | N3    | d=2.543(8) | 0.196 | Sn1 | F2              | d=1.944(7) | 0.761 |
|     |       |            |       | Sn1 | O3              | d=2.037(7) | 0.700 |
|     |       |            |       | Sn1 | O6              | d=2.009(6) | 0.755 |

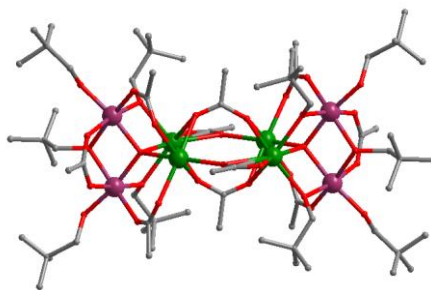**Figure S1.** The molecular structure of reported  $\text{Sn}_4\text{Cd}_4$ .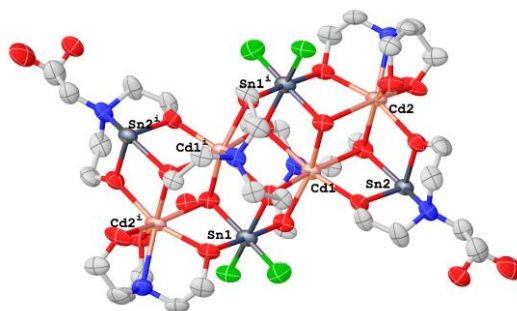**Figure S2.** Thermal ellipsoid plots of **TOC-40** presented at the 50% probability level.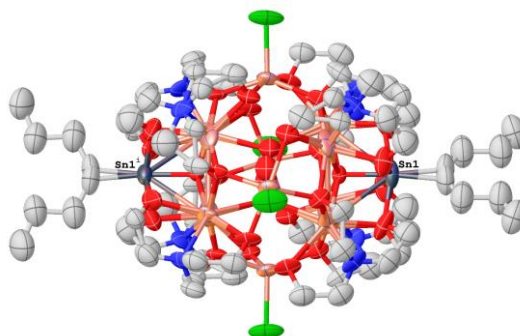**Figure S3.** Thermal ellipsoid plots of **TOC-41** presented at the 50% probability level.

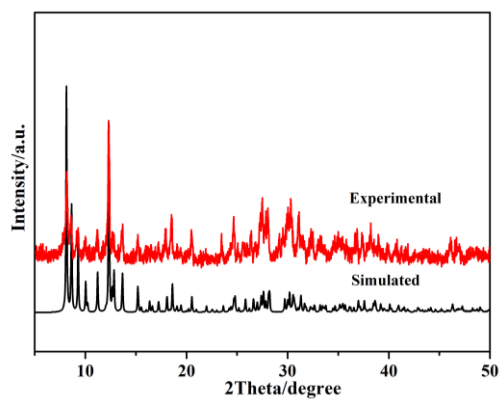

**Figure S4.** Simulated and experimental PXRD patterns of TOC-40.

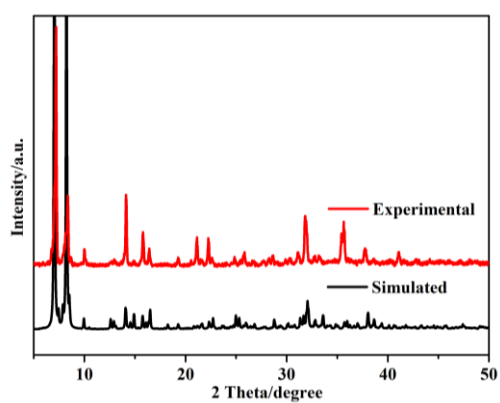

**Figure S5.** Simulated and experimental PXRD patterns of TOC-41.

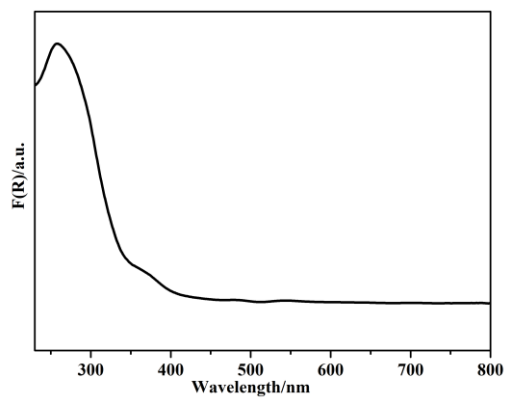

**Figure S6.** UV-vis diffuse reflectance spectrum of compound TOC-40.

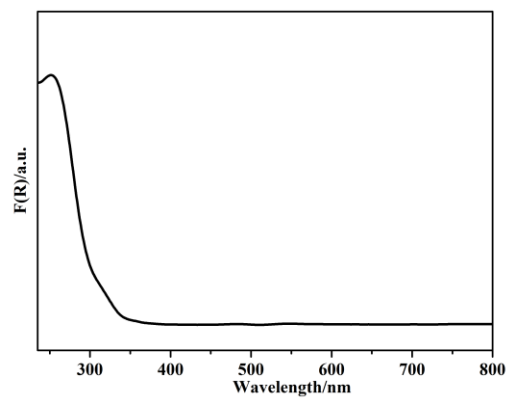

**Figure S7.** UV-vis diffuse reflectance spectrum of compound **TOC-41**.

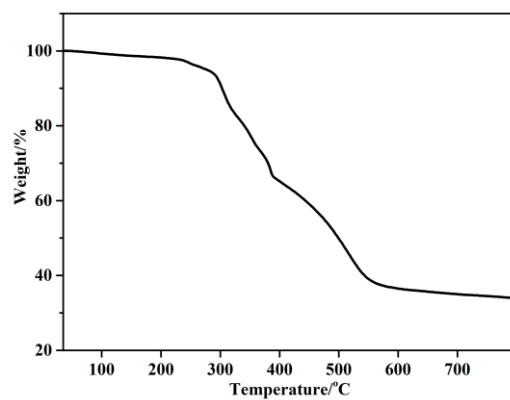

**Figure S8.** TG curve of compound **TOC-40** in N<sub>2</sub> atmosphere.

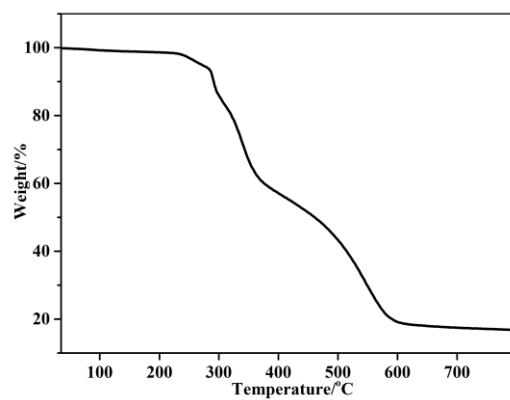

**Figure S9.** TG curve of compound **TOC-41** in N<sub>2</sub> atmosphere.

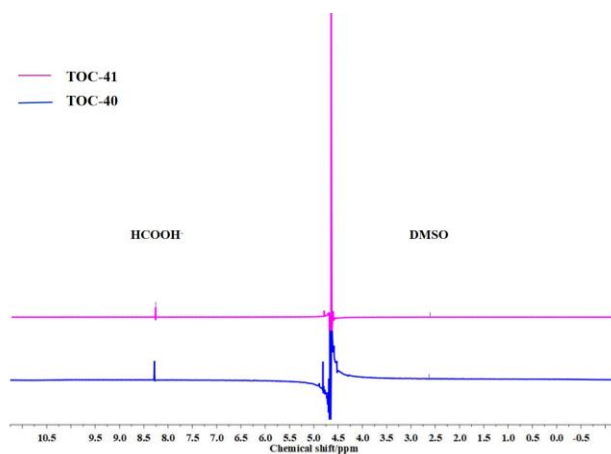

**Figure S10.**  $^1\text{H}$  NMR spectrum of the  $\text{KHCO}_3$  catholyte after 1200 s of  $\text{CO}_2$  reduction on **TOC-40**, **TOC-41** derived electrodes,  $E(\text{RHE}) = -1.0$  V.

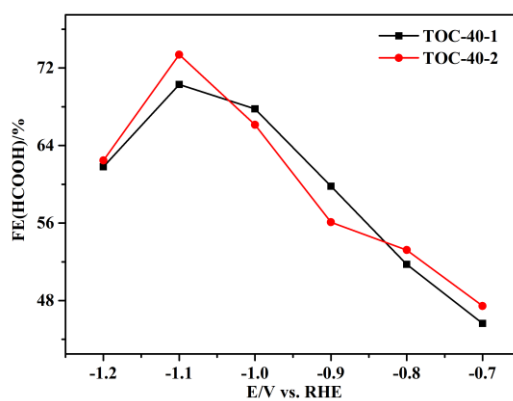

**Figure S11.** Comparison of formate Faraday efficiency in two electrocatalysis experiments using **TOC-40**.

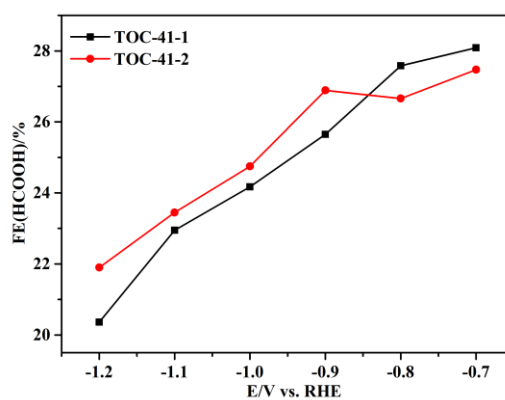

**Figure S12.** Comparison of formate Faraday efficiency in two electrocatalysis experiments using **TOC-41**.

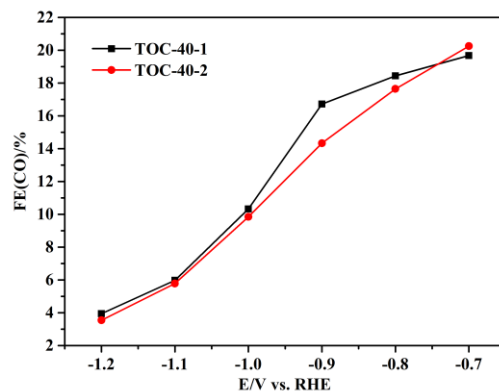

**Figure S13.** Comparison of CO Faraday efficiency in two electrocatalysis experiments using **TOC-40**.

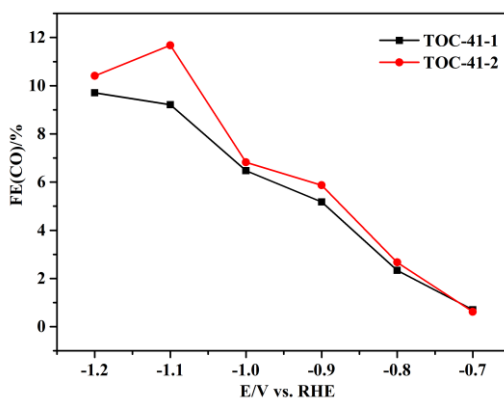

**Figure S14.** Comparison of CO Faraday efficiency in two electrocatalysis experiments using **TOC-41**.

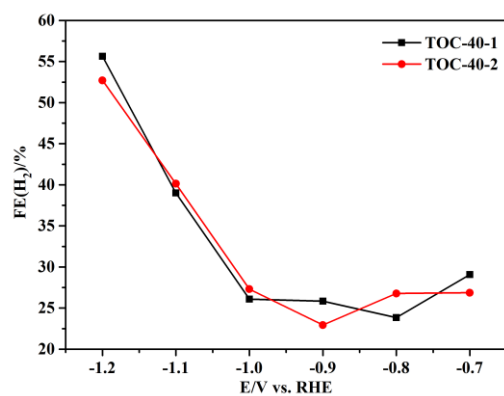

**Figure S15.** Comparison of H<sub>2</sub> Faraday efficiency in two electrocatalysis experiments using **TOC-40**.

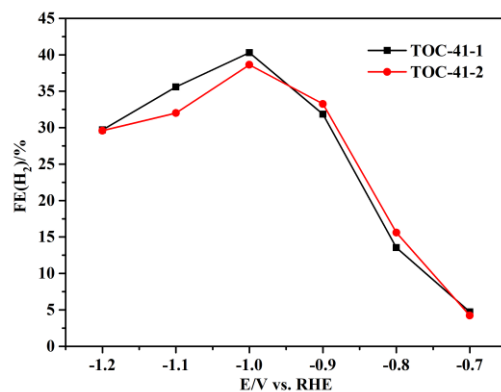

**Figure S16.** Comparison of H<sub>2</sub> Faraday efficiency in two electrocatalysis experiments using **TOC-41**.

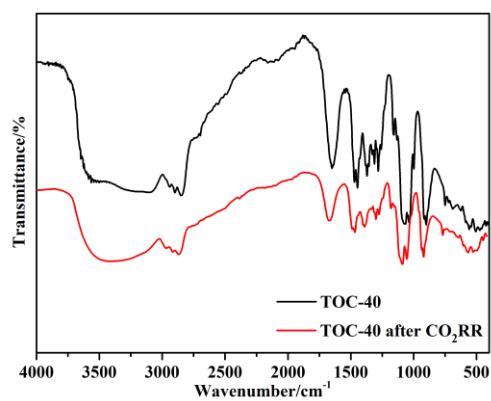

**Figure S17.** IR spectrum of compound **TOC-40** before and after CO<sub>2</sub>RR.

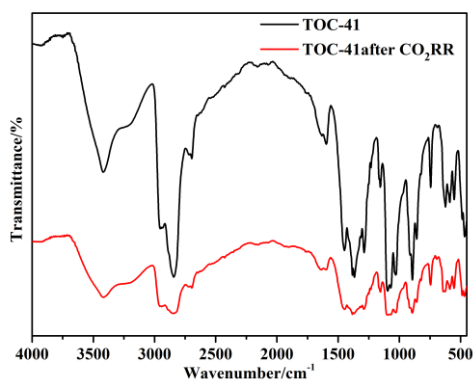

**Figure S18.** IR spectrum of compound **TOC-41** before and after CO<sub>2</sub>RR.
